# Supplementary material for: The origin of multicellularity in cyanobacteria
Source: PubMed Central journal article supplement (PMC3271361; doi:10.1186/1471-2148-11-45), 2011-02-14

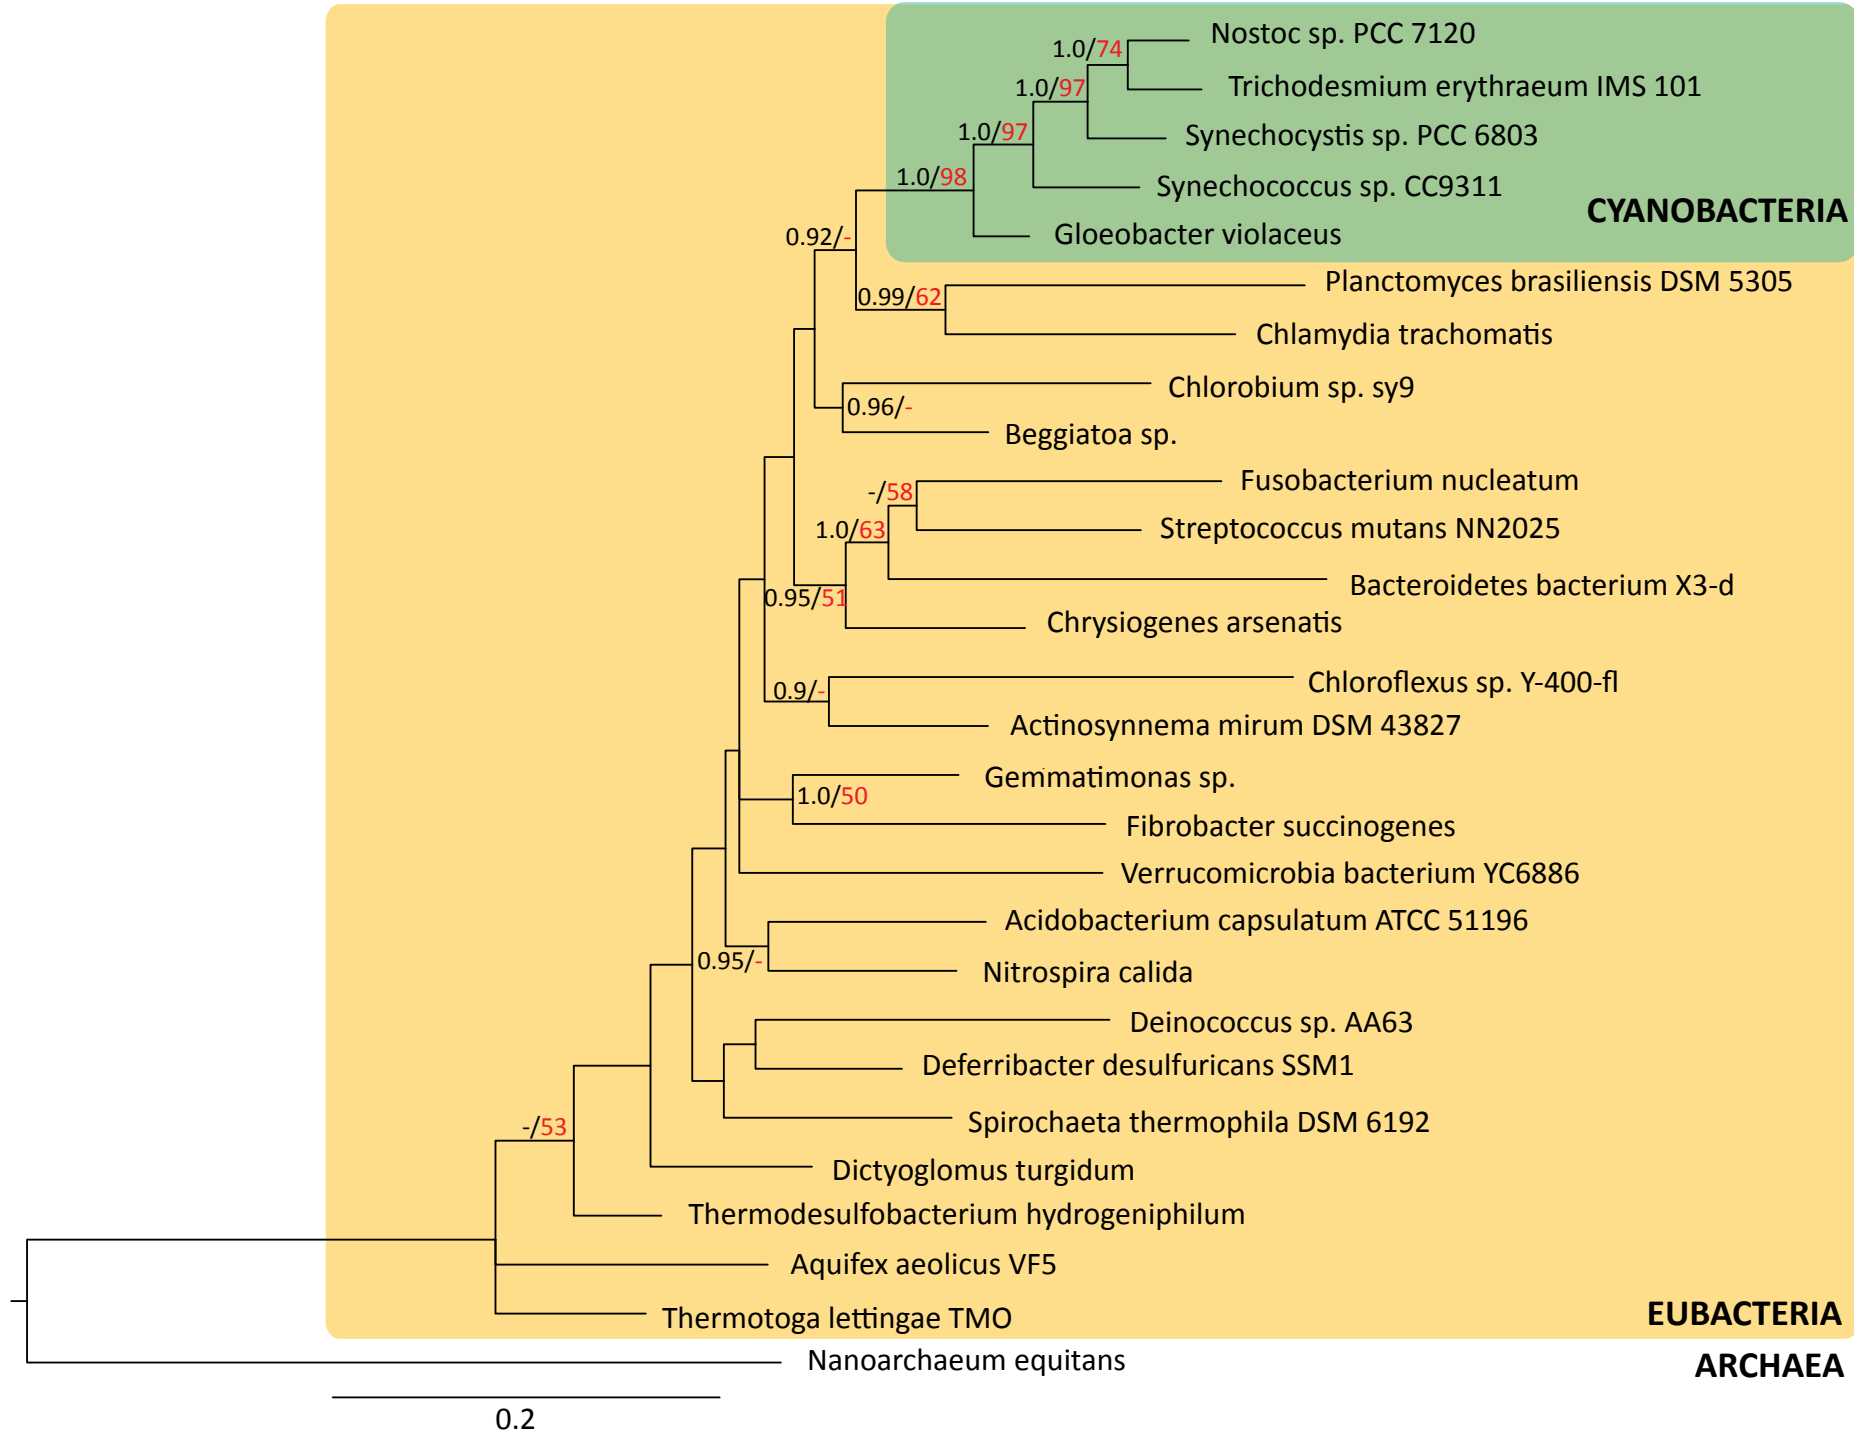

Supplement: 1471-2148-11-45-S1.pdf [file 1471-2148-11-45-S1.pdf]
