# Supplementary material for: The origin of multicellularity in cyanobacteria
Source: PubMed Central journal article supplement (PMC3271361; doi:10.1186/1471-2148-11-45), 2011-02-14
Supplement: 1471-2148-11-45-S4.pdf [file 1471-2148-11-45-S4.pdf]

### **Additional File 3- Degree of substitutional saturation**

| <b>Symmetrical tree</b>        |       |
|--------------------------------|-------|
| Proportion of invariable sites | 0.038 |
| mean H <sup>1</sup>            | 0.33  |
| Standard error                 | 0.018 |
| ISS <sup>2</sup>               | 0.173 |
| ISSc <sup>3</sup>              | 0.756 |

  

| <b>Asymmetrical tree</b> |       |
|--------------------------|-------|
| ISSc <sup>3</sup>        | 0.460 |

<sup>1</sup>Mean entropy for all sites

<sup>2</sup>entropy based index of substitutional saturation

<sup>3</sup>critical value for the index of substitutional saturation
