# Supplementary material for: The origin of multicellularity in cyanobacteria
Source: Springer Nature journal article supplement (doi:10.1186/1471-2148-11-45), 2011-02-14
Supplement: 12862_2010_1652_MOESM13_ESM.pdf [file 12862_2010_1652_MOESM13_ESM.pdf]

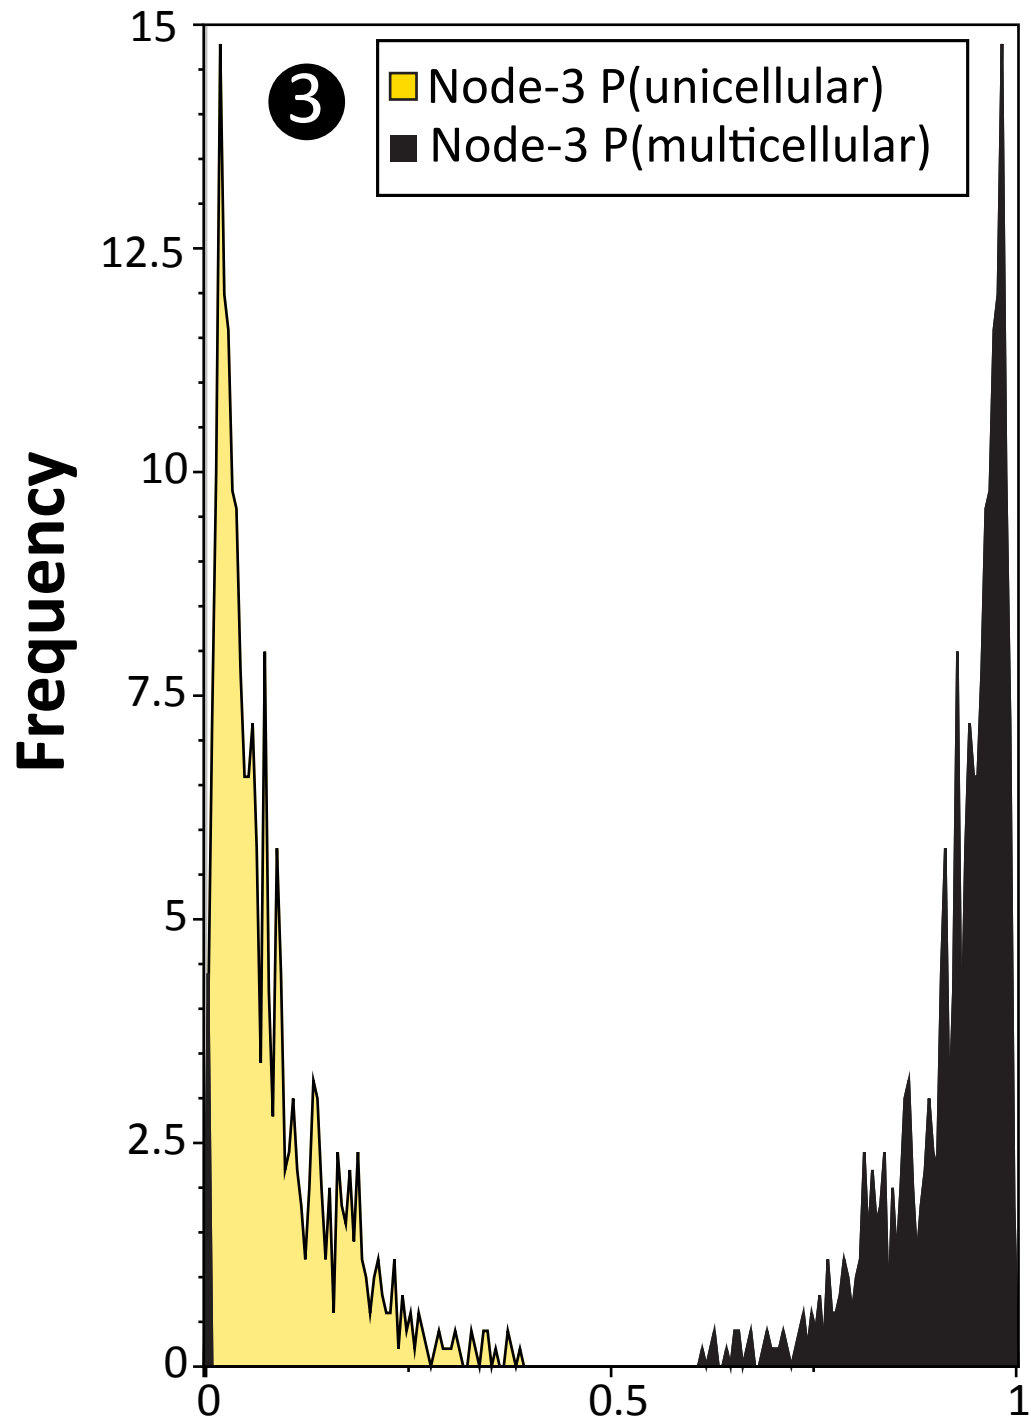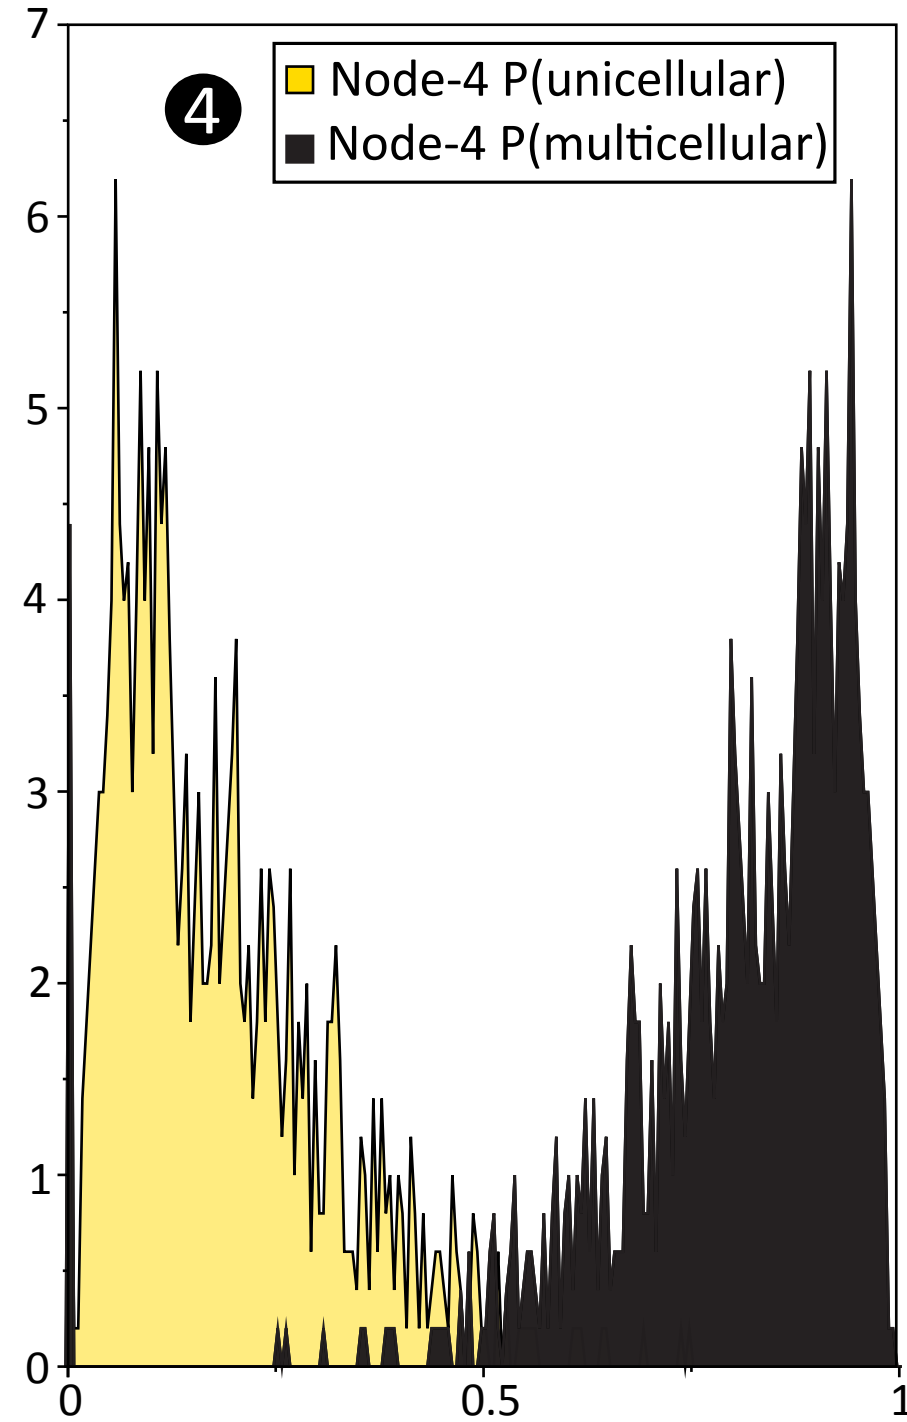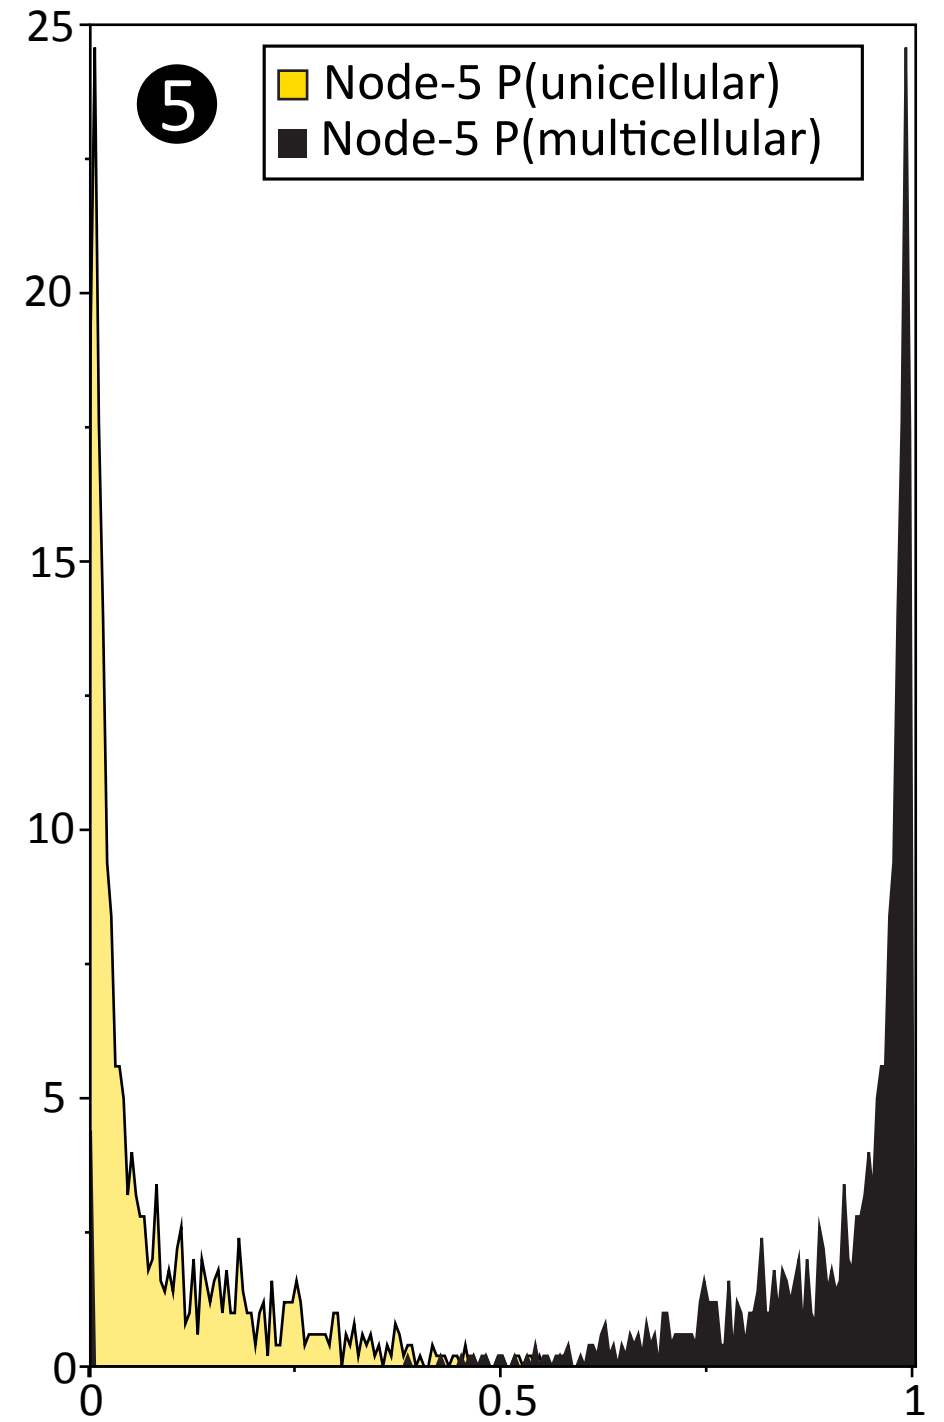

**Posterior Probability Density**
